# Supplementary material for: Mesenchymal stem cell transplantation can restore lupus disease-associated miRNA expression and Th1/Th2 ratios in a murine model of SLE
Source: PubMed Central journal article supplement (PMC5141468; doi:10.1038/srep38237), 2016-12-07
Supplement: srep38237-s1.pdf [file srep38237-s1.pdf]

**Title:**

Mesenchymal stem cell transplantation can restore lupus disease-associated miRNA expression and Th1/Th2 ratios in a murine model of SLE

**Authors:**

Eun Wha Choi<sup>1,2,\*</sup>, DVM, PhD, MinJae Lee<sup>1</sup>, MS, Ji Woo Song<sup>1</sup>, BS, Il Seob Shin<sup>3</sup>, DVM, PhD, Sung Joo Kim<sup>1,4,\*</sup>, MD, PhD

<sup>1</sup>Laboratory Animal Research Center, Samsung Biomedical Research Institute, 81 Irwon-ro, Gangnam-gu, Seoul 135-710, Republic of Korea

<sup>2</sup> School of Medicine, Sungkyunkwan University, 81 Irwon-ro, Gangnam-gu, Seoul 135-710, Republic of Korea

<sup>3</sup> Biostar Stem Cell Research Center, K-STEMCELL, #2-305 IT Castle, 98 GasanDigital2-ro, Geumcheon-gu, Seoul 153-768, Republic of Korea

<sup>4</sup>Department of Surgery, Division of Transplantation, Samsung Medical Center, Sungkyunkwan University School of Medicine, 81 Irwon-ro, Gangnam-gu, Seoul 135-710, Republic of Korea

\*Corresponding author E-mail: [vet.cew@gmail.com](mailto:vet.cew@gmail.com)

[kmhyj111@gmail.com](mailto:kmhyj111@gmail.com)

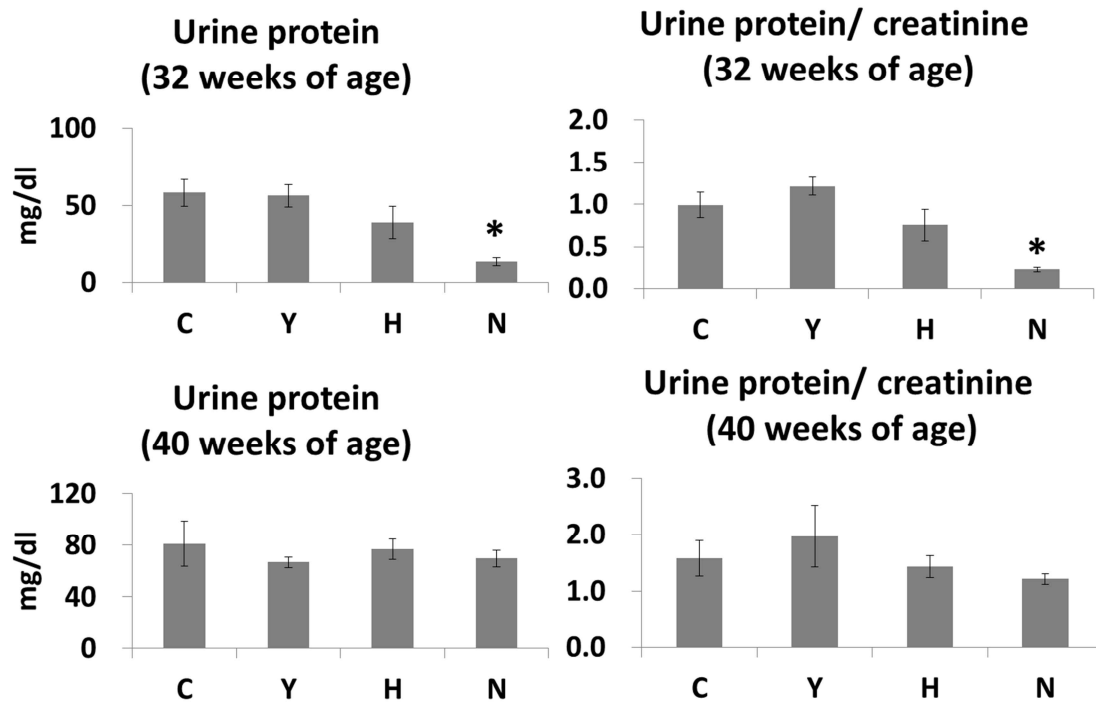

**Supplementary Figure 1. Protein concentration and urine protein/urine creatinine ratio (UP/C) data in C3.MRL-Fas<sup>lpr</sup>/J mice and background matched control C3H mice after treatment.** Urine protein concentration and urine protein/urine creatinine ratio (UP/C) are presented. Data obtained from each group were compared using a one-way analysis of variance (ANOVA) followed by *post hoc* Tukey's multiple comparison tests. \*: significant ( $p < 0.05$ ) differences from the control (C) group are indicated by an asterisk. N: normal group (C3H), C: control group (C3.MRL-Fas<sup>lpr</sup>/J), saline-, Y: cyclophosphamide-, H: ASC-treatment group.

## A. Representative gating scheme

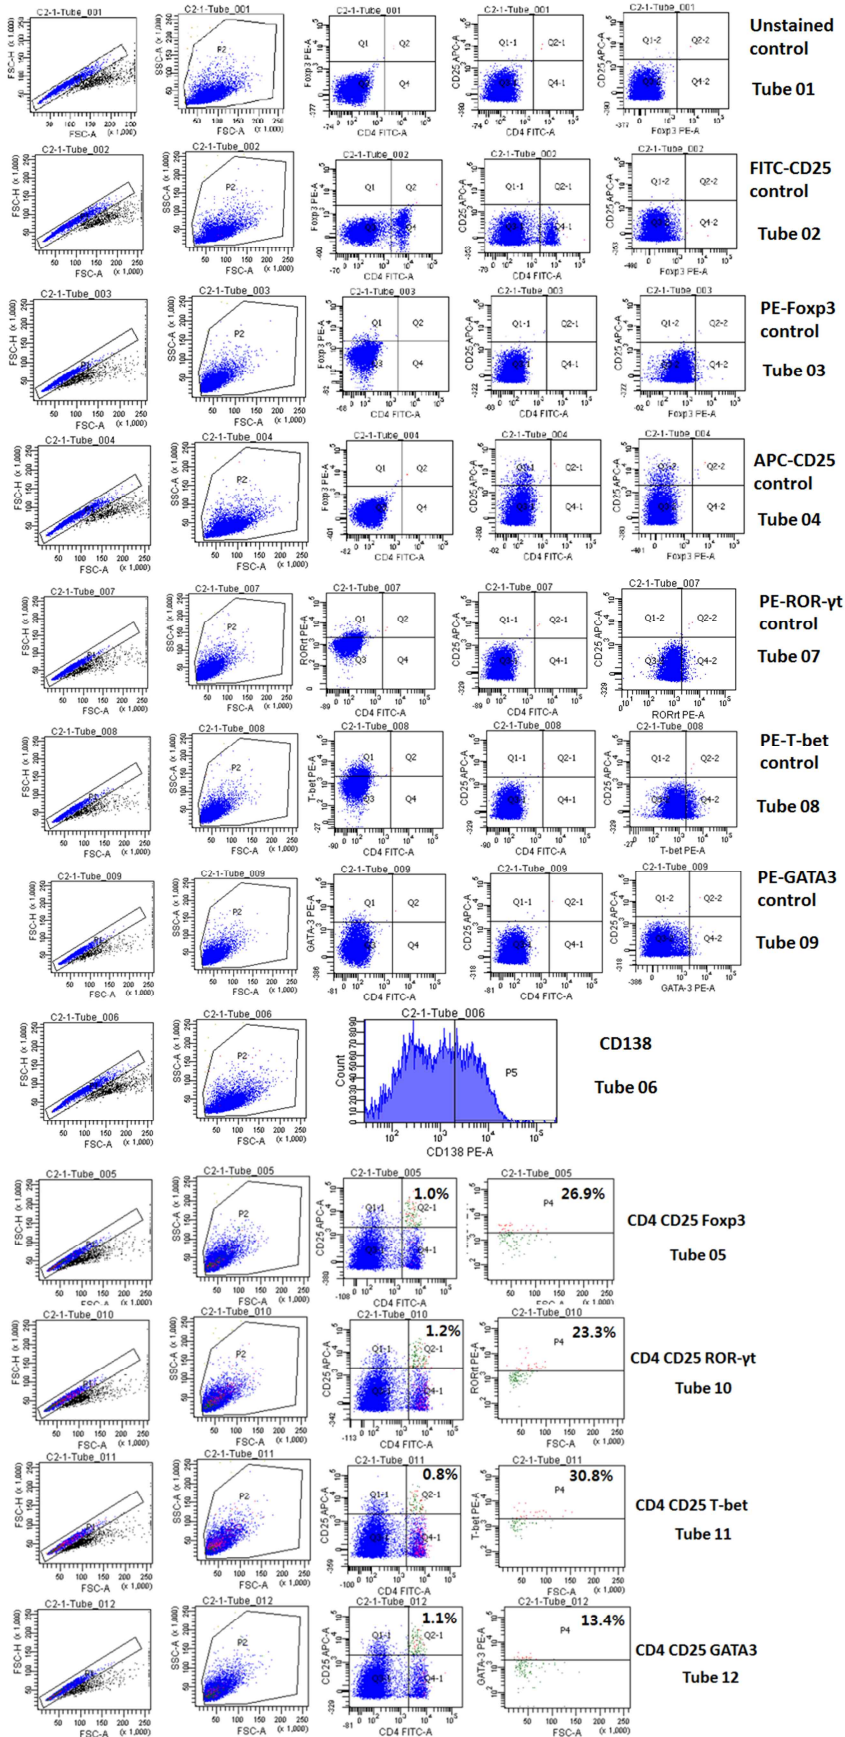

## B. Representative multi-color flow cytometry gating analysis

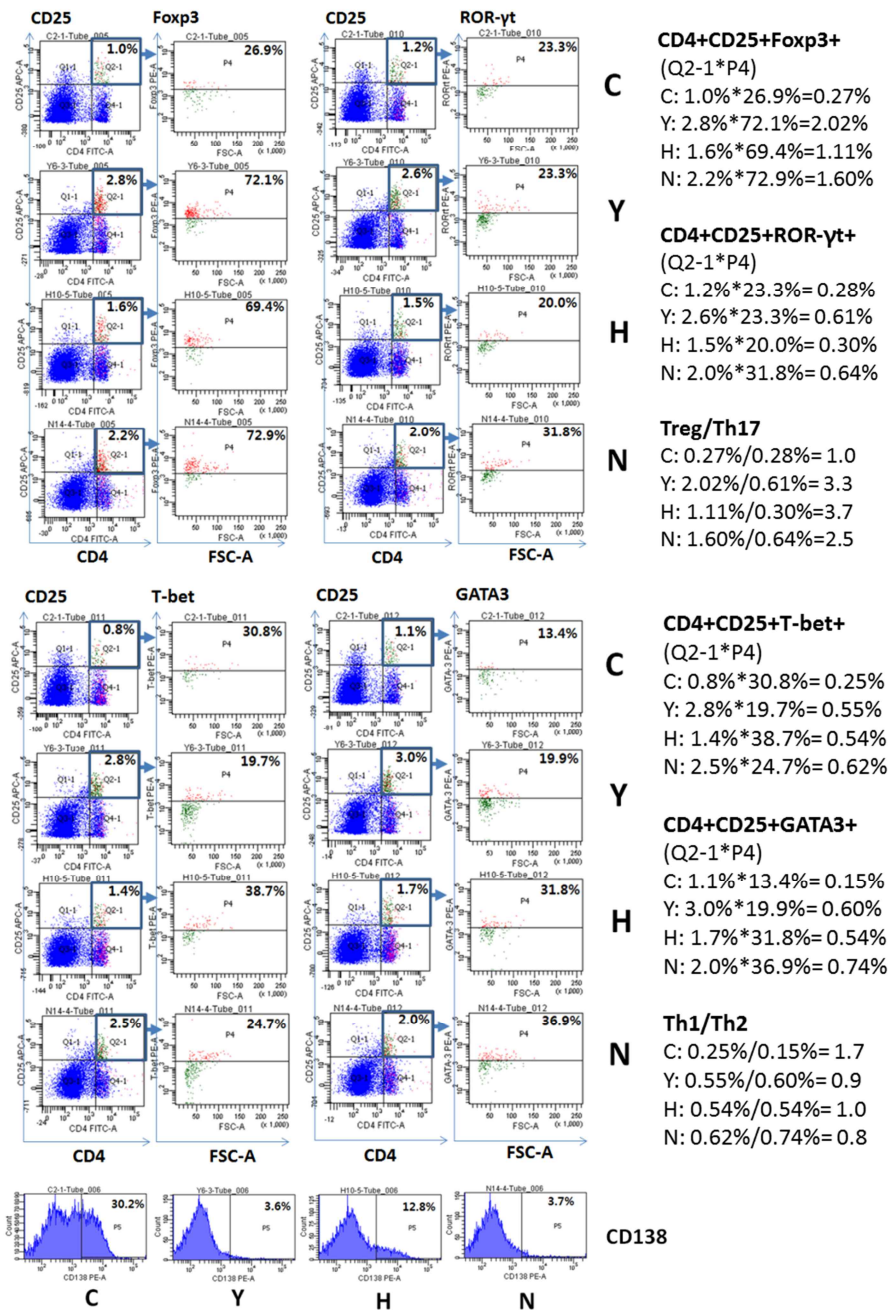

Supplementary Figure 2. Flow cytometric determination of the T helper cell subset (Th1, Th2, Th17, and Treg) and CD138 cells in the spleen. (A) A representative gating scheme and (B) representative multi-color flow cytometry gating analysis figures are presented. C: control group (C3.MRL-Fas<sup>lpr</sup>/J mice), Y: cyclophosphamide-treatment group (C3.MRL-Fas<sup>lpr</sup>/J mice), H: ASC-treatment group (C3.MRL-Fas<sup>lpr</sup>/J mice) and N: normal group (Background-matched control C3H mice).

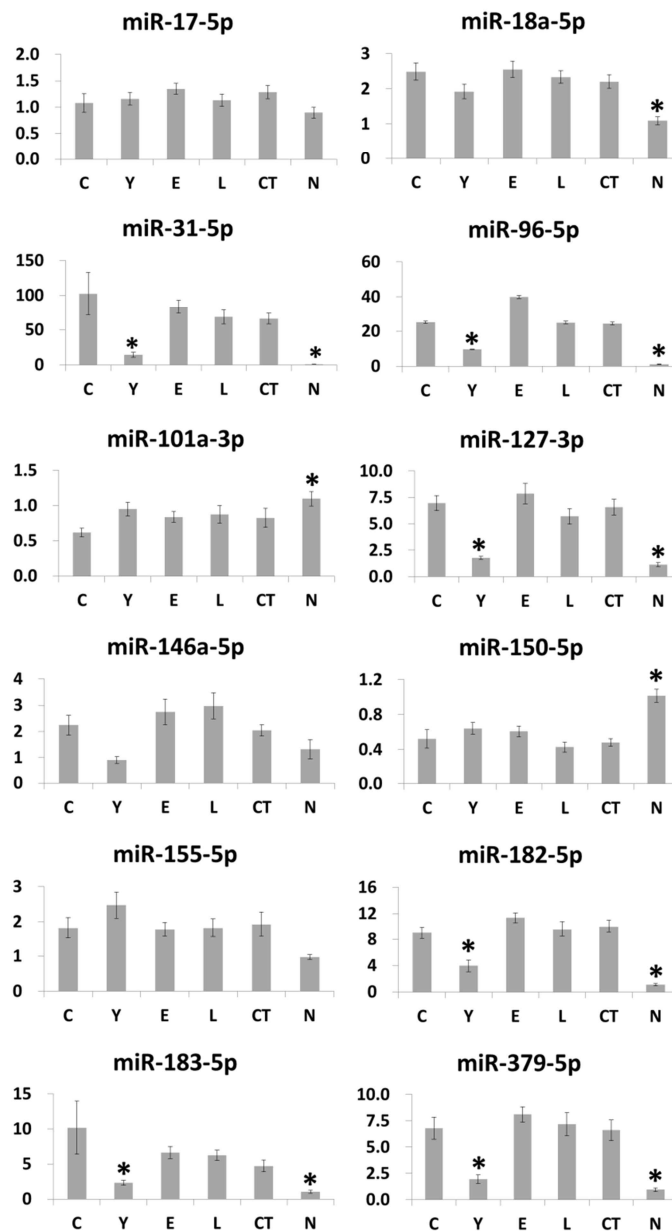

**Supplementary Figure 3. Comparison of the expression levels of common lupus disease-associated miRNAs in spleens among the groups.** The expression levels of common lupus disease-associated miRNAs in spleens. Data are normalized to those of RNU6-2 and SNORD96A (average CT) and are expressed as means (bars)  $\pm$  SEM (error bars) of the relative amount compared to one sample of normal group. N: normal group (MRL/MPJ), C: control group (MRL/lpr), saline-, Y: cyclophosphamide-, E: ASC-early, L: ASC-late and CT: CTLA4Ig-ASC-treatment group. Data obtained from groups were analyzed using a one-way analysis of variance followed by *post hoc* Tukey's multiple comparison tests. \*: significant ( $p < 0.05$ ) differences from the control (C) group are indicated by an asterisk.

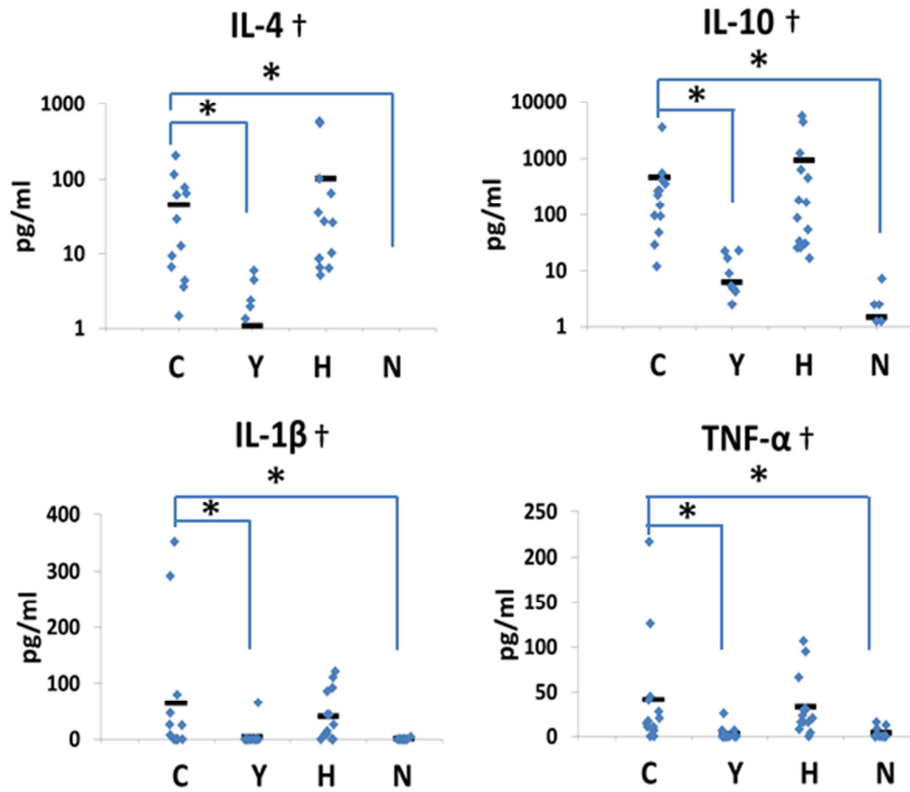

**Supplementary Figure 4. Cytokine levels in sera from each experimental group.** Data obtained from each group were compared using the Kruskal Wallis test (†:  $P < 0.05$ ). \*: Significant ( $p < 0.05$ ) differences versus the C group are marked by asterisk (Mann-Whitney U test). C: control group (C3.MRL-Fas<sup>lpr</sup>/J mice), Y: cyclophosphamide-treatment group (C3.MRL-Fas<sup>lpr</sup>/J mice), H: ASC-treatment group (C3.MRL-Fas<sup>lpr</sup>/J mice) and N: normal group (Background-matched control C3H mice).
